# Supplementary material
Source: PubMed Central journal article supplement (PMC3198846)
Supplement: NIHMS36204-supplement-3.pdf [file NIHMS36204-supplement-3.pdf]

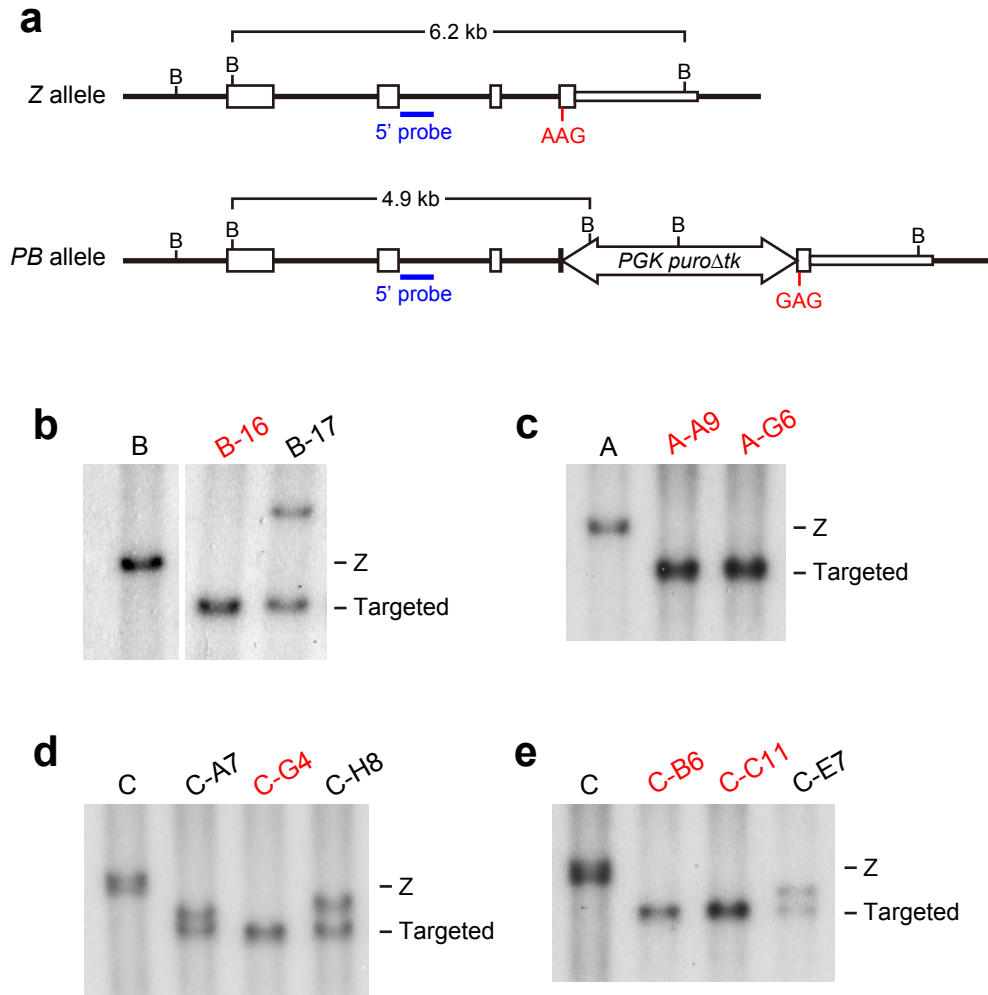

**Supplementary Figure 1.** Southern blot analyses of bi-allelic targeting of the *A1AT* gene in 3 independent A1ATD-hiPSC lines. **a**, The structures of the Z allele and the targeted *PB* allele. Thin and thick open boxes, non-coding and coding exon, respectively; B, BamHI. **b**, The result obtained with A1ATD-hiPSCs from patient B. Both alleles in line B-16 were correctly targeted while line B-17 carried one correctly targeted allele and one abnormal allele. **c-e**, Similar results were obtained with A1ATD-hiPSCs generated from patient A (**c**) and from patient C (**d**, **e**). Genomic DNA was digested by BamHI and hybridized with the 5' external probe. The first lane on each panel is DNA from the parental A1ATD-hiPSC line. Correct homozygous clones are highlighted in red.

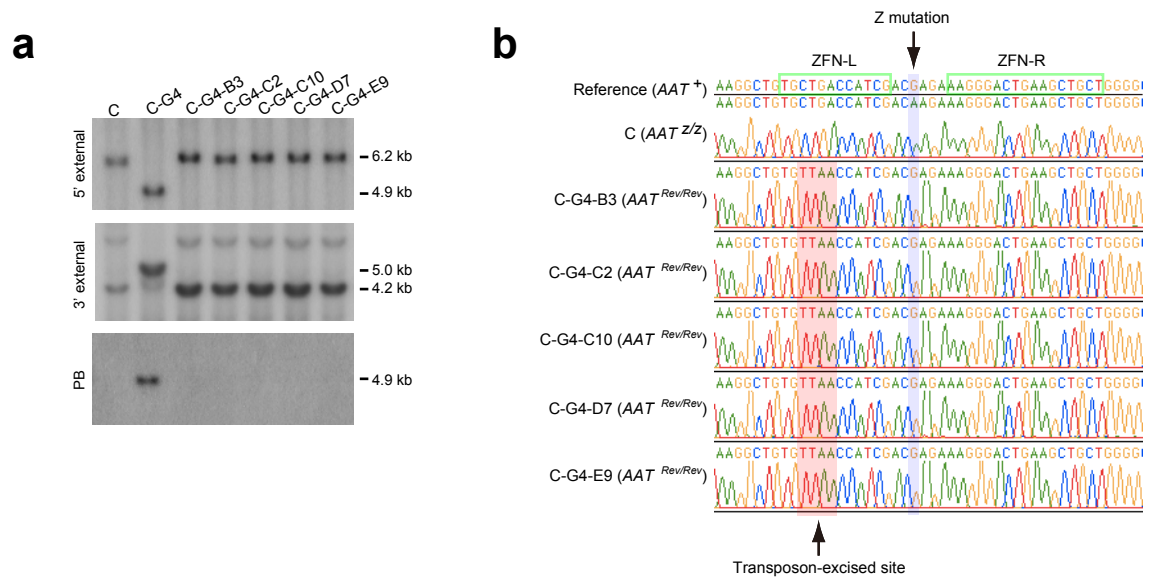

**Supplementary Figure 2.** Characterization of genome modification in A1ATD-hiPSC line C. **a, b**, Southern blot (**a**) and sequence (**b**) analyses showing bi-allelic correction of Z mutation in A1ATD-hiPSCs generated from patient C. See Fig. 2 for details.

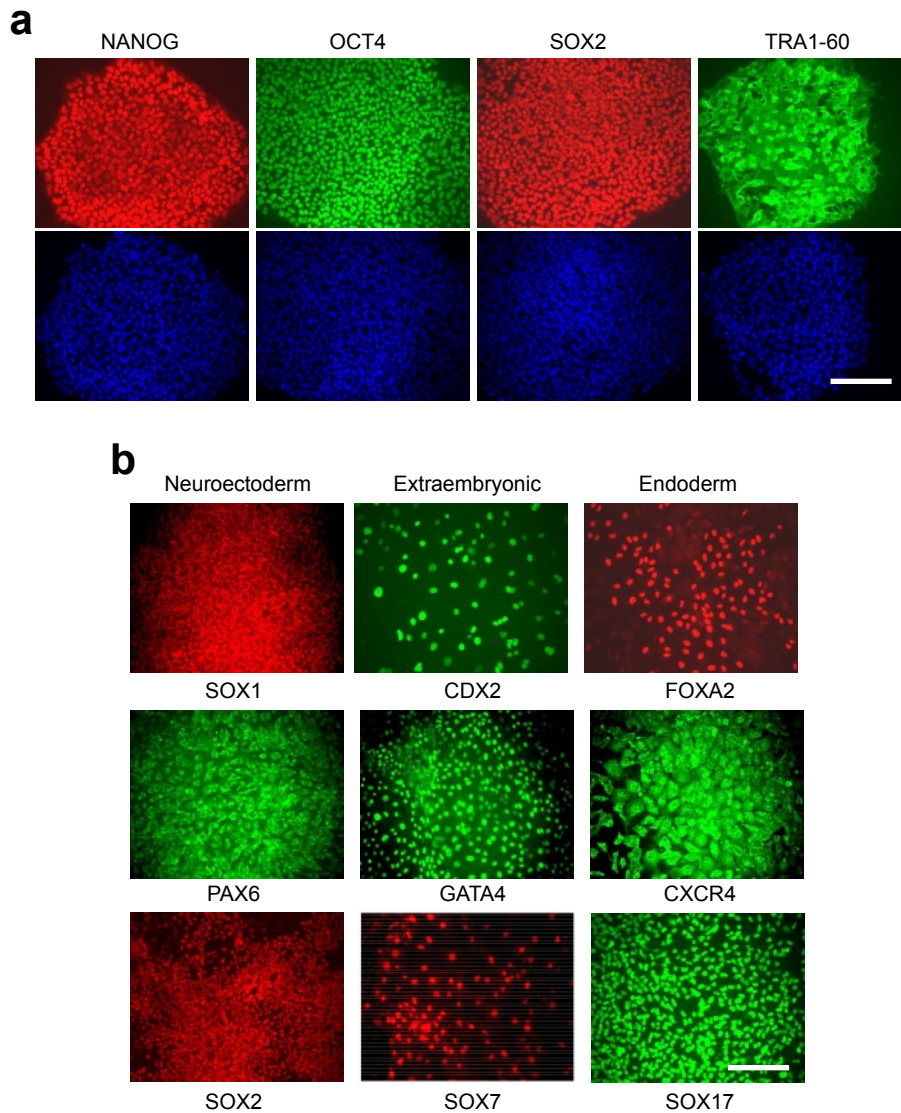

**Supplementary Figure 3.** Pluripotency of corrected hIPSCs.

**a**, Immunofluorescence showing the expression of pluripotency markers OCT4, SOX2, NANOG and TRA1-60 in c-hIPSCs grown for 20 passages after correction. DNAs were stained with DAPI (lower panels). **b**, Immunofluorescence of *in vitro* differentiated c-hIPSCs showing maintenance of differentiation capacity into three germ layers. Scale bars, 200  $\mu$ m

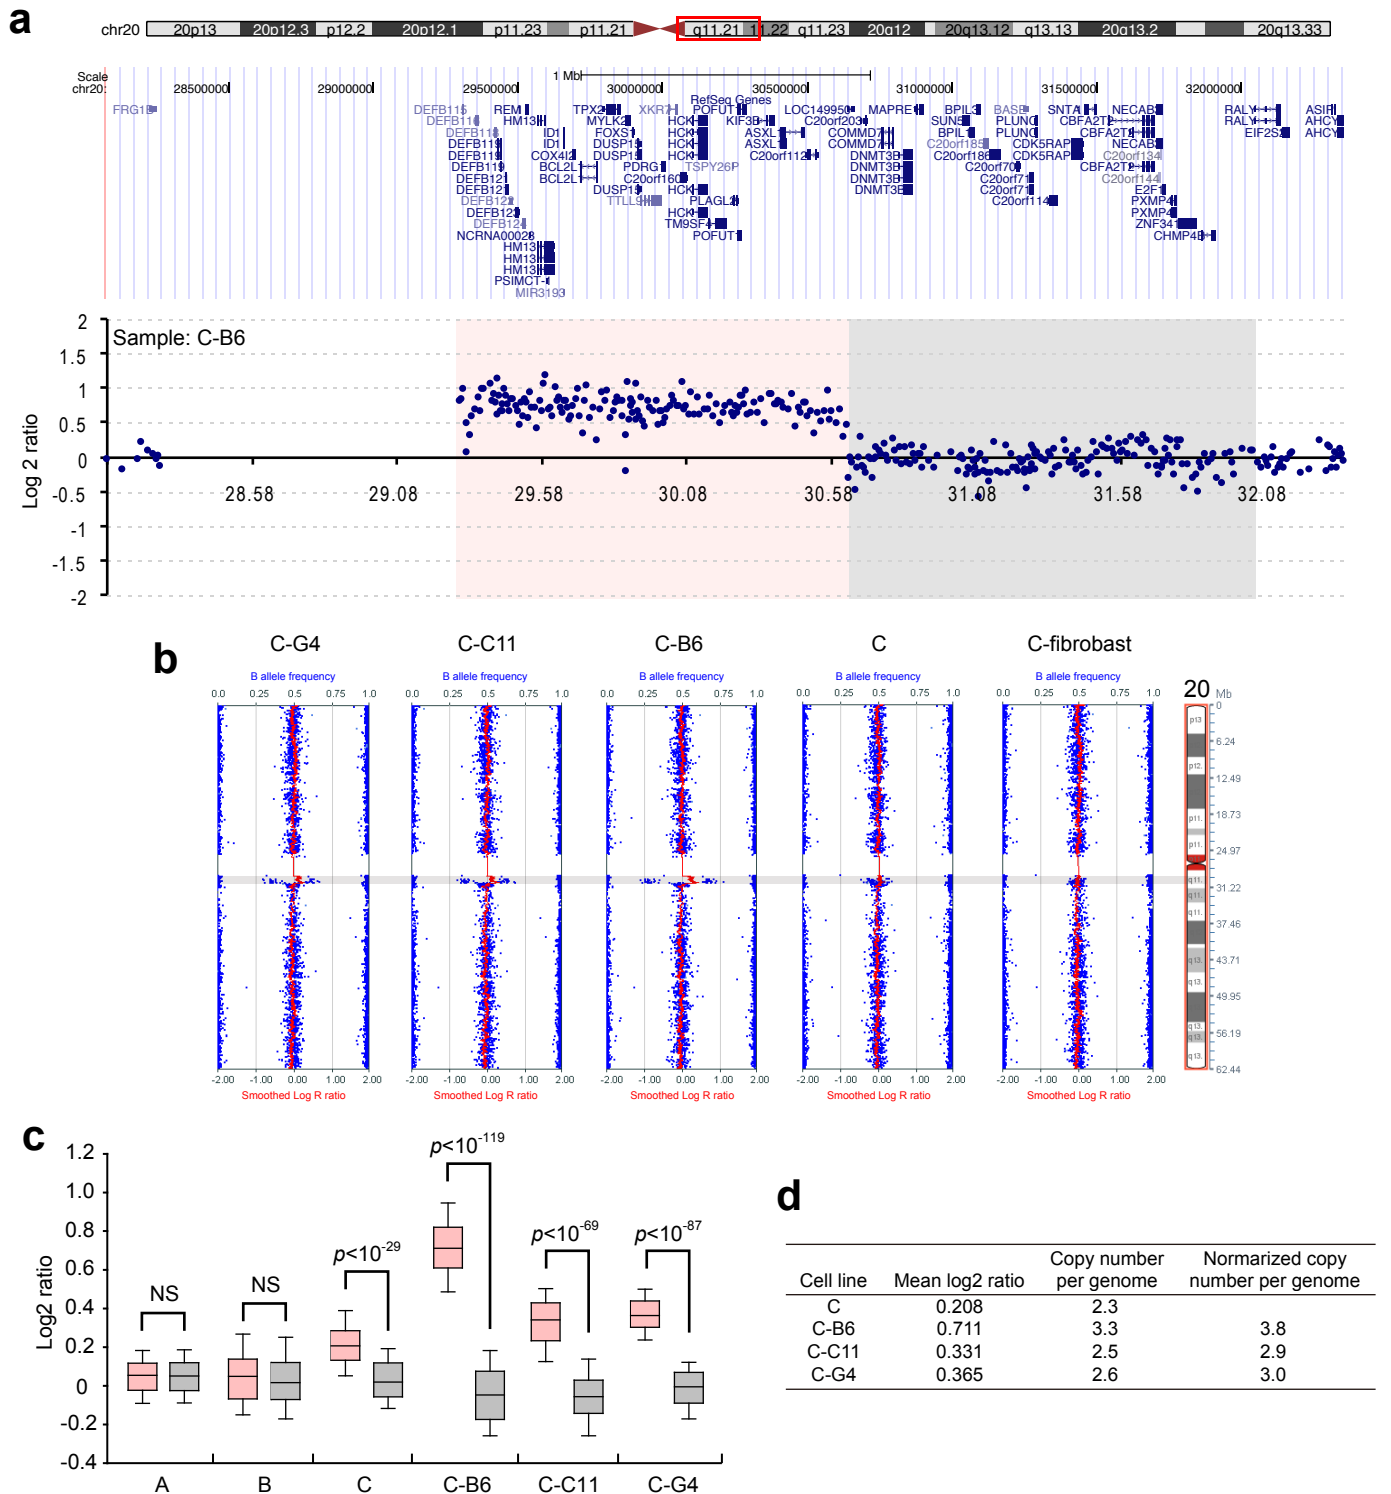

**Supplementary Figure 4. Detailed analysis of 20q11.21 amplification**

**a**, aCGH result of the homozygous clone, C-B6. Top, an ideogram of chromosome 20; middle, genes in the region pointed by red in the chromosome ideogram; bottom, the log<sub>2</sub> ratio plot of C-B6. The amplified region is highlighted in red. The log<sub>2</sub> ratios in the adjacent region highlighted in gray are used as a normal copy number control for a comparison shown in **c**. **b**, SNP data showing B allele frequency (x axis on top) and smoothed log *R* ratio (x axis on bottom) of chromosome 20 of indicated cell lines. The 20q11.21 is highlighted in gray. **c**, Box plots showing log<sub>2</sub> ratios of the affected (red) and the adjacent normal (gray) regions. Bars within the box plots represent median values. The ends of bars indicate the 25th and 75th percentiles, and the 10th and 90th percentiles are represented by error bars. Student' s *t*-test was performed. NS, not significant. **d**, Copy number and normalized copy number of the 20q11.21 region per diploid genome. Copy numbers were calculated from mean values of log<sub>2</sub> ratio in the region. Copy numbers in the homozygous clones were further normalized with the calculated copy number of A1ATD-iPSC line C.

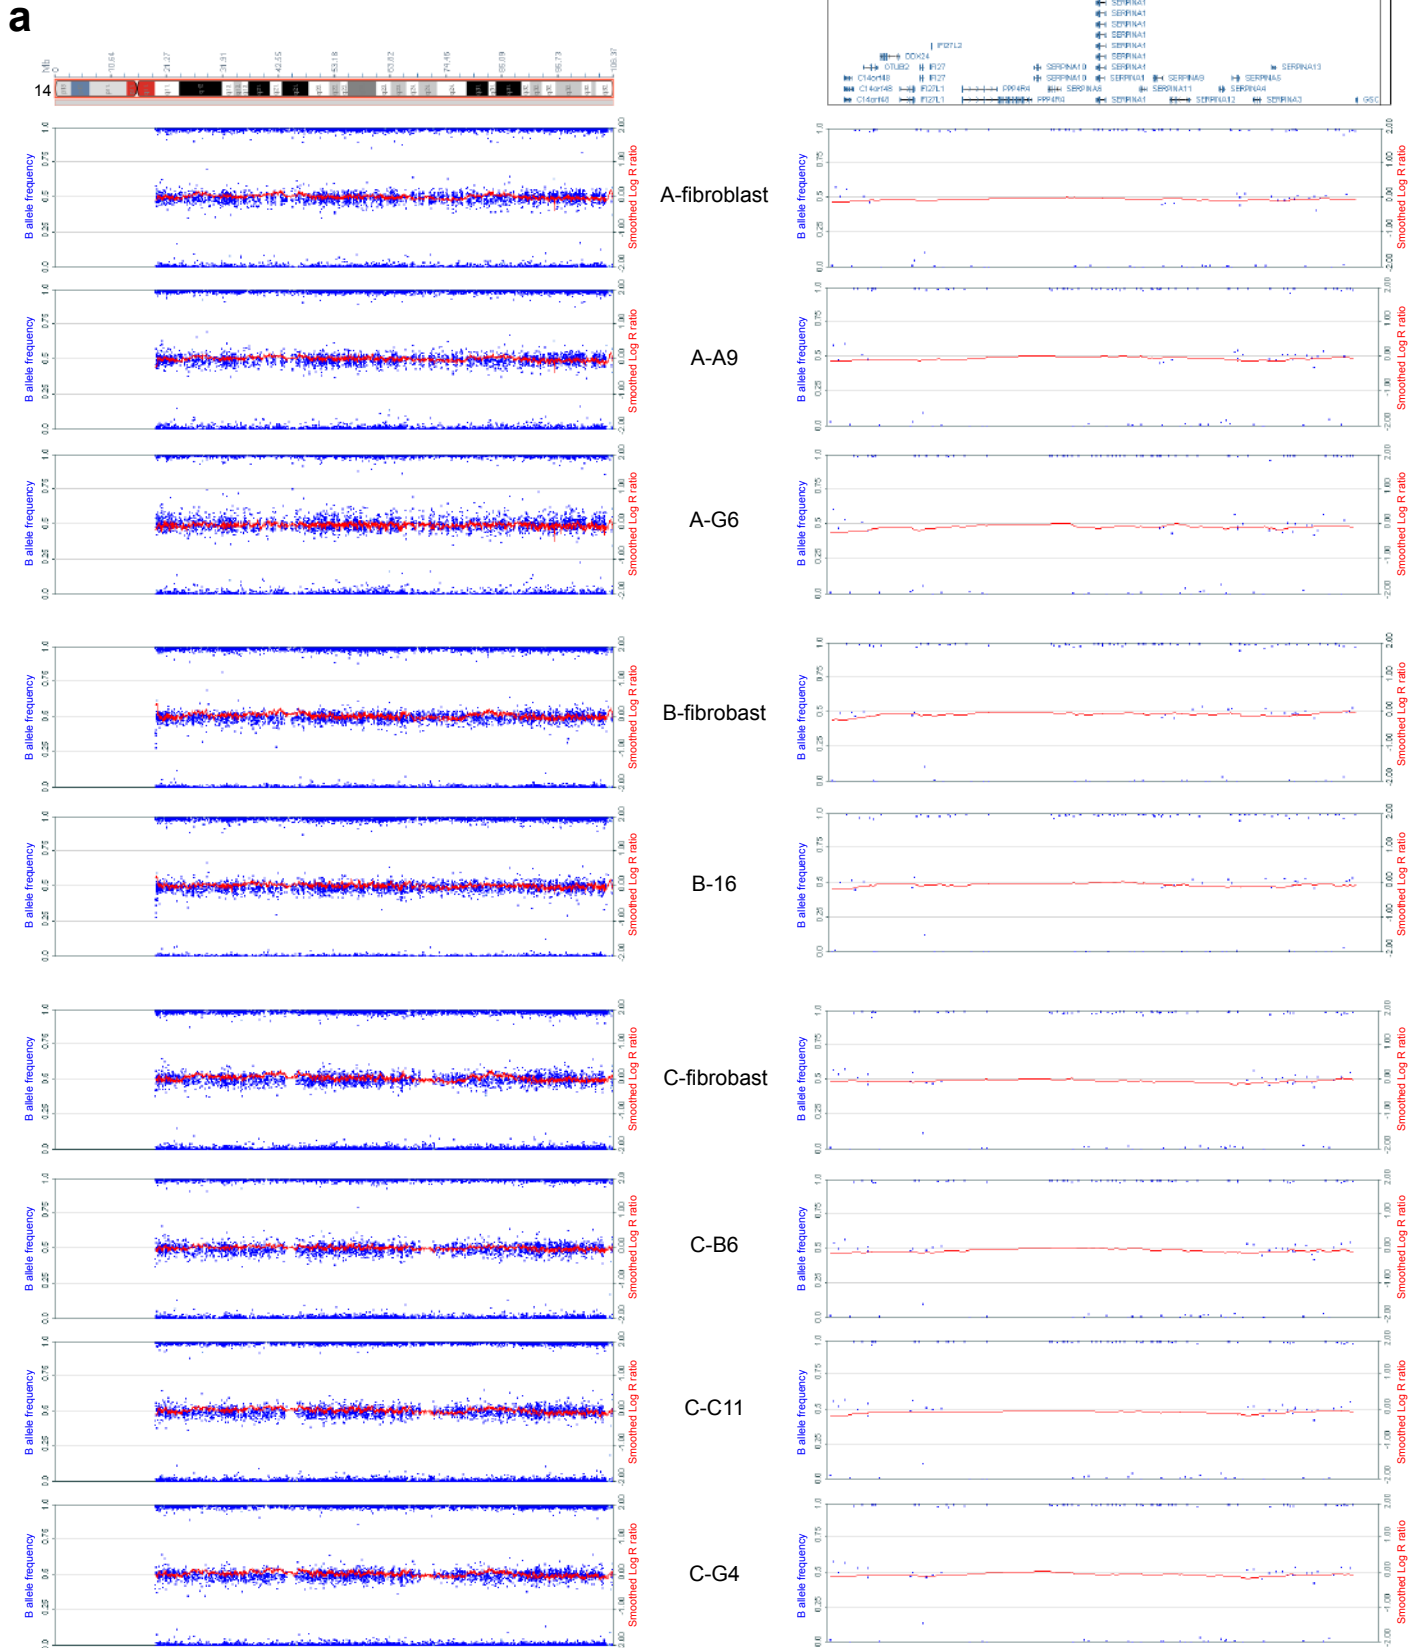

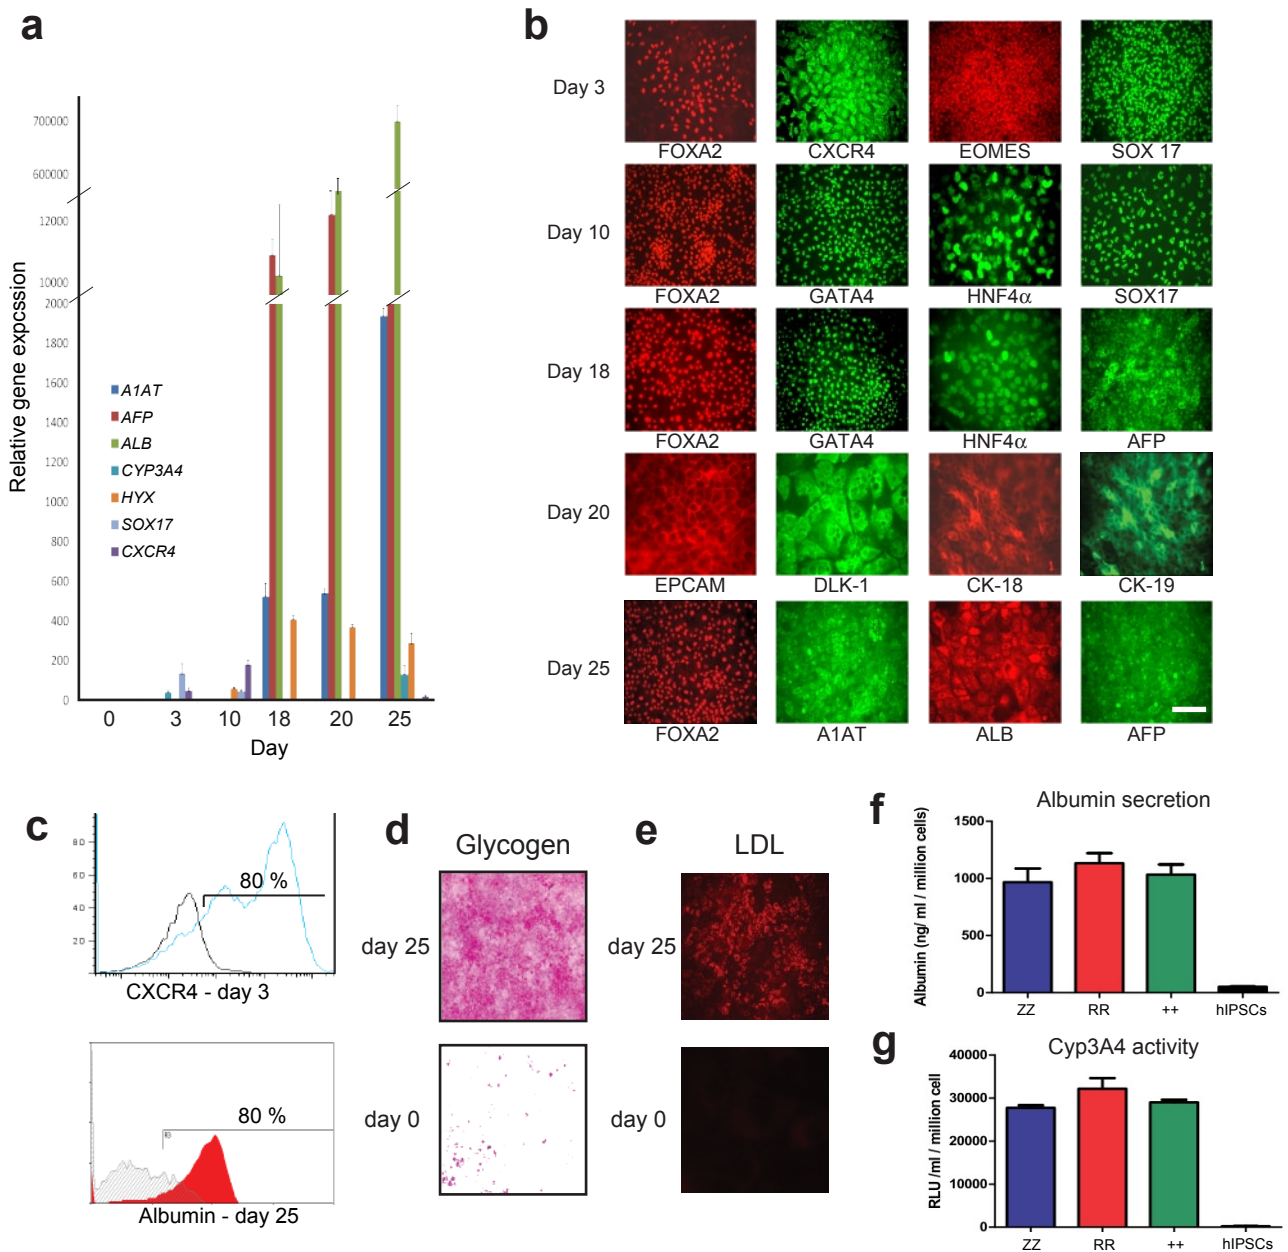

**Supplementary Figure 6.** Differentiation of corrected hiPSCs into hepatocyte-like cells.

**a**, Quantitative RT-PCR analyses showing the expression of markers of liver development during c-hiPSCs differentiation. Values are normalized to expression on day 0. **b**, Immunostaining showing the expression of specific proteins marking key stages of hepatocyte development during c-hiPSCs differentiation (Day 3, endoderm; Day 10, hepatic endoderm; Day 18 and 20, hepatic progenitor; Day 25, hepatocyte-like cells). **c**, Flow cytometric analyses showing that 80% of cells are positive for CXCR4 at 3 days of differentiation (endoderm stage) and 80% of cells are positive for Albumin at 25 days of differentiation. **d-g**, c-hiPSCs-derived hepatocyte-like cells display functional activity characteristic of primary human hepatocytes including presence of intracellular glycogen storage as shown by periodic acid Schiff staining (**d**), uptake of DiI-LDL (**e**), albumin secretion (**f**) and CytP450 metabolism (**g**). Scale bar, 100  $\mu$ m

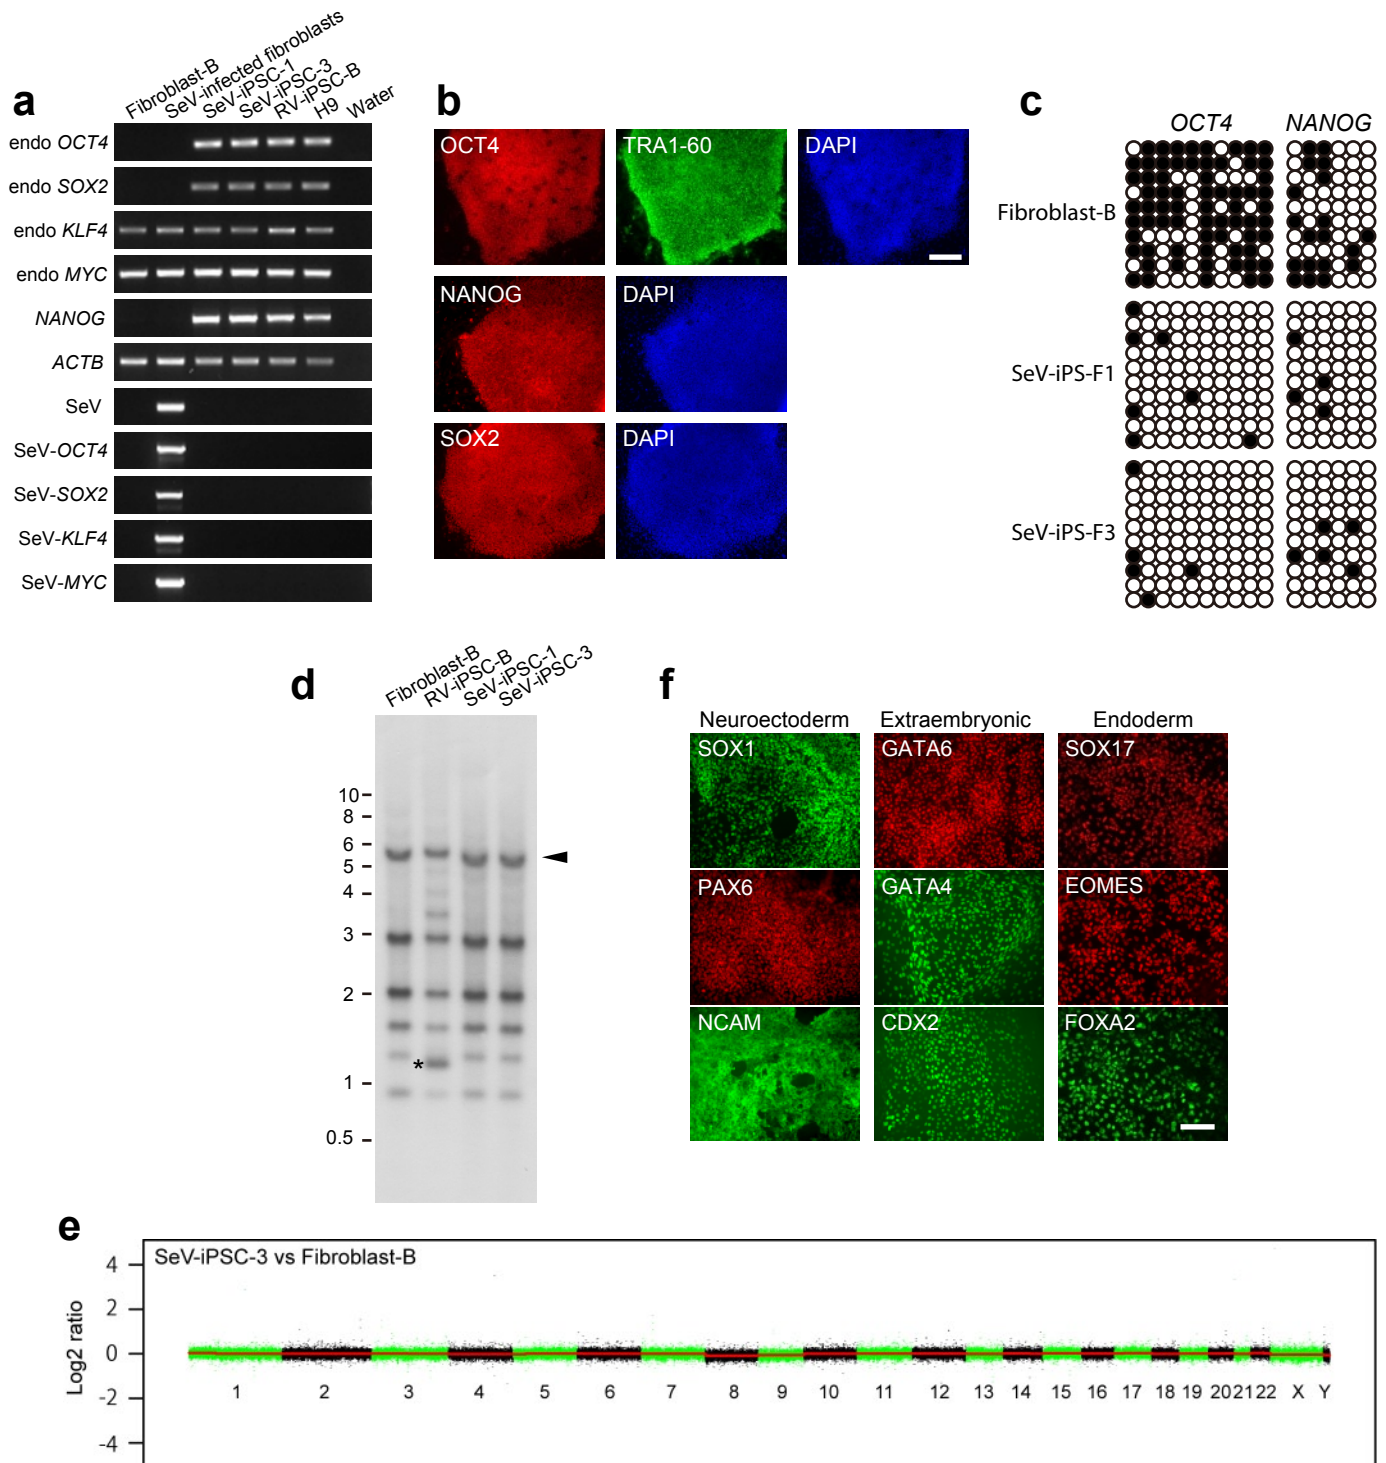

**Supplementary Figure 7. Characterization of integration-free A1ATD-hiPSC.**

**a, b**, Pluripotency marker expression by RT-PCR (**a**) and immunostaining (**b**) analyses. Note that Sendai virus (SeV) genome were not detected in established iPSC lines. RV, retrovirus. **c**, Bisulfite sequencing of *OCT4* and *NANOG* promoter regions. **d**, Southern blot analysis of the key pluripotency gene, *OCT4*, showing an evidence of integration-free iPSCs. Genomic DNA was digested with *Pst*I. The *OCT4* exon1 was used as a probe. Arrowhead, endogenous *OCT4*; asterisk, provirus-derived *OCT4*. **e**, CGH plot of primary hiPSC line 3, showing no copy number change. **f**, Immunostaining of *in vitro* differentiated cells, showing maintenance of differentiation capacity. Scale bars, 500  $\mu$ m (**b**), 200  $\mu$ m (**e**)

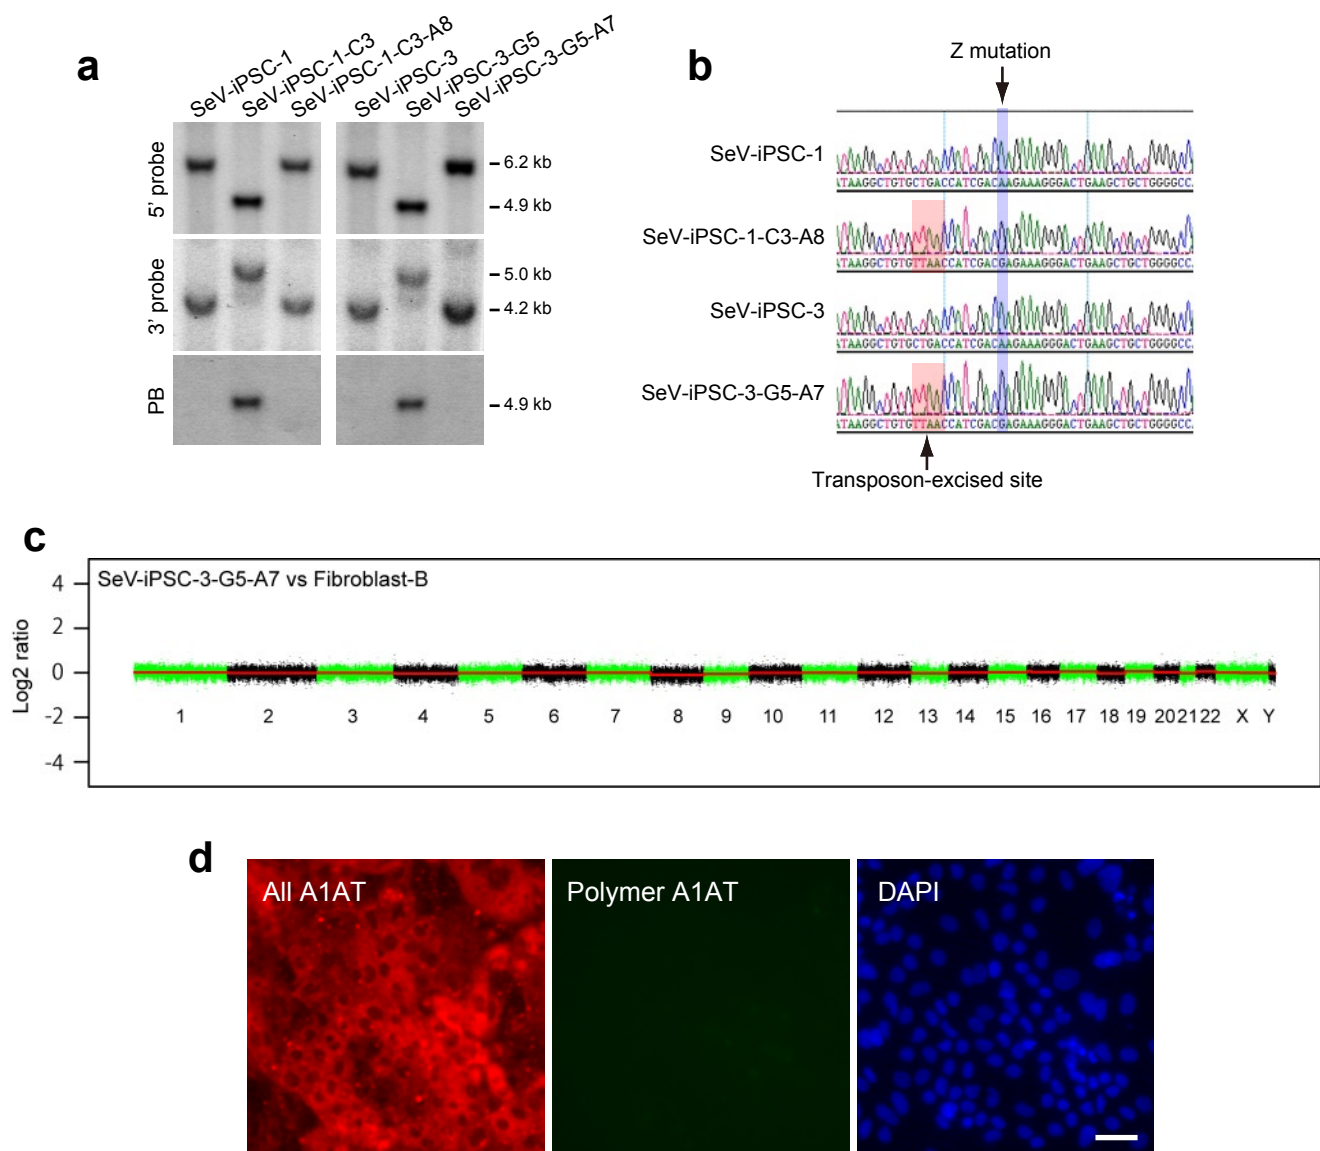

**Supplementary Figure 8.** Correction of the Z mutation in the integration-free A1ATD-hIPSC line B.

**a**, Validation of genetic modification by Southern blot analysis. See Fig. 2 for the detail. **b**, Sequencing analysis of gene correction. Note that the Z mutation (A) is corrected to wild-type sequence (G), while the *piggyBac* excisions produced TTAACA as designed. **c**, CGH analysis showing that the 3-G5-A7 line kept the intact genome compared to the parental fibroblasts. **d**, Immunostaining of 3-G5-A7-derived hepatocyte-like cells, showing that the corrected cells express normal A1AT proteins. Left, all forms of A1AT; middle, polymeric A1AT; right, DNA staining by DAPI. Scale bar, 50  $\mu$ m.



Supplementary Table 1. ZFN design

| ZFN name | Target sequence <sup>a</sup><br>(5'-3') | Triplet subsites<br>(5'-3') | Finger designs <sup>b</sup><br>-1123456 |    |
|----------|-----------------------------------------|-----------------------------|-----------------------------------------|----|
| ZFN-L    | gtCGATGGTCAGCAca                        | CGA                         | QSAHRIT                                 | F4 |
|          |                                         | TGG                         | RSDHLST                                 | F3 |
|          |                                         | TCA                         | QSADRTK                                 | F2 |
|          |                                         | GCA                         | QSGSLTR                                 | F1 |
| ZFN-R    | gaAAGGGActGAAGCTGCTgg                   | AAG                         | RLDNRTA                                 | F5 |
|          |                                         | GGA                         | QSGHLAR                                 | F4 |
|          |                                         | GAA                         | QSGNLAR                                 | F3 |
|          |                                         | GCT                         | QSSDLSR                                 | F2 |
|          |                                         | GCT                         | QSSDLRR                                 | F1 |

<sup>a</sup> The core DNA target sequences (capital letters) and 2 flanking bases on each side (small letters) are shown. <sup>b</sup> The amino acid residues at positions '-1' to '+6' of the recognition alpha helix<sup>31,32</sup> of each of the zinc finger DNA-binding domain for each DNA triplet target are shown.

Supplementary Table 2. aCGH analyses of primary A1ATD-hIPSCs and their derivatives

| Cell line                                                 | A1AT genotype | Reference Genome | Abnormality | Chr. | Band        | Size    | Mean log2 ratio | No. of affected genes |
|-----------------------------------------------------------|---------------|------------------|-------------|------|-------------|---------|-----------------|-----------------------|
| <b>a. Primary A1ATD-hIPSCs</b>                            |               |                  |             |      |             |         |                 |                       |
| A                                                         | Z/Z           | A-Fibroblast     | -           |      |             |         |                 |                       |
| B                                                         | Z/Z           | B-Fibroblast     | Gain        | 1    | p36.11      | 300 kb  | 0.60            | 8                     |
|                                                           |               |                  | Loss        | 8    | q22.2       | 20 kb   | -0.93           | 1                     |
| C                                                         | Z/Z           | C-Fibroblast     | Loss        | 2    | p22.3       | 207 kb  | -0.96           | 1                     |
|                                                           |               |                  | Loss        | 17   | q23.1       | 142 kb  | -0.76           | 3                     |
|                                                           |               |                  | Gain *      | 20   | q11.21      | 1.34 Mb | 0.21            | 30                    |
| <b>b. Homozygously targeted clones</b>                    |               |                  |             |      |             |         |                 |                       |
| A-A9                                                      | PB/PB         | A                | -           |      |             |         |                 |                       |
| A-G6                                                      | PB/PB         | A                | Loss        | 14   | q23.13      | 23 kb   | -0.87           | 0                     |
| B-16                                                      | PB/PB         | B                | -           |      |             |         |                 |                       |
| C-B6                                                      | PB/PB         | C                | Gain *      | 20   | q11.21      | 1.34 Mb | 0.71            | 30                    |
| C-C11                                                     | PB/PB         | C                | -           |      |             |         |                 |                       |
| C-G4                                                      | PB/PB         | C                | -           |      |             |         |                 |                       |
| <b>c. Clones with bi-allelic <i>piggyBac</i> excision</b> |               |                  |             |      |             |         |                 |                       |
| B-16-C2                                                   | Rev/Rev       | B                | -           |      |             |         |                 |                       |
| B-16-C3                                                   | Rev/Rev       | B                | -           |      |             |         |                 |                       |
| B-16-C6                                                   | Rev/Rev       | B                | -           |      |             |         |                 |                       |
| B-16-D2                                                   | Rev/Rev       | B                | -           |      |             |         |                 |                       |
| B-16-E4                                                   | Rev/Rev       | B                | Gain        | 22   | q11.23      | 47 kb   | 0.89            | 1                     |
| B-16-E5                                                   | Rev/Rev       | B                | Gain        | 15   | q26.2       | 4.7 kb  | 1.15            | 1                     |
| B-16-F4                                                   | Rev/Rev       | B                | -           |      |             |         |                 |                       |
| B-16-F10                                                  | Rev/Rev       | B                | Gain        | 17   | q23.3-q24.2 | 4.7 Mb  | 0.62            | 56                    |
| B-16-G8                                                   | Rev/Rev       | B                | -           |      |             |         |                 |                       |
| B-16-G10                                                  | Rev/Rev       | B                | Gain        | 4    | q31.3       | 262 kb  | 0.57            | 1                     |
| B-16-H4                                                   | Rev/Rev       | B                | -           |      |             |         |                 |                       |
| C-G4-B3                                                   | Rev/Rev       | C                | -           |      |             |         |                 |                       |
| C-G4-C2                                                   | Rev/Rev       | C                | -           |      |             |         |                 |                       |
| C-G4-C10                                                  | Rev/Rev       | C                | -           |      |             |         |                 |                       |
| C-G4-D7                                                   | Rev/Rev       | C                | -           |      |             |         |                 |                       |
| C-G4-E9                                                   | Rev/Rev       | C                | -           |      |             |         |                 |                       |
| <b>d. <i>in vitro</i> differentiated hepatocytes</b>      |               |                  |             |      |             |         |                 |                       |
| B-16-C2-hep.                                              | Rev/Rev       | B-16-C2          | -           |      |             |         |                 |                       |

\* See Supplementary Fig. 4 and Supplementary Analysis for more detail.

Supplementary Table 3. Validated mutations in protein coding regions identified by exome sequencing

| Chr   | Position  | Wt Allele | Mut Allele | Gene_ID     | Transcript_ID       | Mutation type | cDNA annotation | Protein annotation | Detected in |        |      |         | SIFT functional prediction | Expression in hepatocytes *** |
|-------|-----------|-----------|------------|-------------|---------------------|---------------|-----------------|--------------------|-------------|--------|------|---------|----------------------------|-------------------------------|
|       |           |           |            |             |                     |               |                 |                    | Fibro-B     | IPSC-B | B-16 | B-16-C3 |                            |                               |
| Chr1  | 35223302  | G         | A          | GJB5        | ENST00000338513_r62 | MISSENSE      | c.371G>A        | p.R124Q            |             |        |      |         | TOLERATED                  | -                             |
| Chr1  | 173499158 | C         | A          | SLC9A11     | ENST00000367714_r62 | SILENT        | c.2199G>T       | p.V733V            |             |        |      |         | N/A                        | -                             |
| Chr1  | 233314872 | C         | A          | PCNXL2      | ENST00000258229_r62 | MISSENSE      | c.3116G>T       | p.G1039V           |             |        |      |         | DAMAGING                   | -                             |
| Chr3  | 42705381  | C         | T          | ZBTB47      | ENST00000457842_r62 | SILENT        | c.702C>T        | p.G234G            |             |        |      |         | N/A                        | +                             |
| Chr3  | 100962755 | C         | T          | IMPG2       | ENST00000193391_r62 | MISSENSE      | c.2420G>A       | p.R807K            |             |        |      |         | TOLERATED                  | -                             |
| Chr3  | 189586471 | G         | A          | TP63        | ENST00000264731_r62 | SILENT        | c.1095G>A       | p.S365S            |             |        |      |         | N/A                        | -                             |
| Chr3  | 189586472 | G         | A          | TP63        | ENST00000264731_r62 | MISSENSE      | c.1096G>A       | p.D366N            |             |        |      |         | TOLERATED                  | -                             |
| Chr4  | 2831347   | G         | A          | SH3BP2      | ENST00000452765_r62 | SILENT        | c.714G>A        | p.P238P            |             |        |      |         | N/A                        | +                             |
| Chr4  | 57182264  | C         | A          | KIAA1211    | ENST00000264229_r62 | MISSENSE      | c.2596C>A       | p.Q866K            |             |        |      |         | TOLERATED                  | -                             |
| Chr4  | 122254096 | G         | T          | QRFPR       | ENST00000394427_r62 | MISSENSE      | c.677C>A        | p.P226H            |             |        |      |         | DAMAGING                   | -                             |
| Chr5  | 14692993  | C         | T          | FAM105B     | ENST00000284274_r62 | MISSENSE      | c.895C>T        | p.R299C            |             |        |      |         | TOLERATED                  | +                             |
| Chr5  | 33936907  | T         | C          | RXFP3       | ENST00000330120_r62 | MISSENSE      | c.62T>C         | p.L21P             |             |        |      |         | DAMAGING*                  | +                             |
| Chr6  | 166883328 | C         | A          | RPS6KA2     | ENST00000265678_r62 | SPLICE        | Exon11+1G>T     | N/A                |             |        |      |         | N/A                        | +                             |
| Chr7  | 5567522   | T         | C          | ACTB        | ENST00000331789_r62 | MISSENSE      | c.985A>G        | p.I329V            |             |        |      |         | DAMAGING*                  | +                             |
| Chr9  | 124083640 | A         | C          | GSN         | ENST00000373823_r62 | MISSENSE      | c.1286A>C       | p.Y429S            |             |        |      |         | DAMAGING                   | +                             |
| Chr9  | 125424828 | C         | T          | OR1L1       | ENST00000373686_r62 | SILENT        | c.984C>T        | p.T328T            |             |        |      |         | N/A                        | -                             |
| Chr11 | 4143385   | G         | A          | RRM1        | ENST00000300738_r62 | MISSENSE      | c.1053G>A       | p.M351I            |             |        |      |         | DAMAGING                   | +                             |
| Chr11 | 28119199  | C         | T          | KIF18A      | ENST00000263181_r62 | MISSENSE      | c.296G>A        | p.R99H             |             |        |      |         | DAMAGING                   | +                             |
| Chr11 | 76909568  | C         | A          | MYO7A       | ENST00000409709_r62 | SILENT        | c.4470C>A       | p.I1490I           |             |        |      |         | N/A                        | -                             |
| Chr12 | 129180382 | C         | T          | TMEM132C    | ENST00000315208_r62 | MISSENSE      | c.511C>T        | p.R171C            |             |        |      |         | DAMAGING                   | -                             |
| Chr13 | 99361826  | G         | A          | SLC15A1     | ENST00000376503_r62 | MISSENSE      | c.1067C>T       | p.T356I            |             |        |      |         | DAMAGING                   | +                             |
| Chr14 | 69521806  | A         | G          | DCAF5       | ENST00000341516_r62 | MISSENSE      | c.1597T>C       | p.S533P            |             |        |      |         | DAMAGING                   | +                             |
| Chr14 | 94844957  | C         | T          | SERPINA1 ** | ENST00000440909_r62 | SILENT        | c.1086G>A       | p.L362L            |             |        |      |         | N/A                        | +                             |
| Chr14 | 94844959  | G         | A          | SERPINA1 ** | ENST00000440909_r62 | SILENT        | c.1084C>T       | p.L362L            |             |        |      |         | N/A                        | +                             |
| Chr14 | 106378125 | G         | T          | IGHD5-5     | ENST00000390588_r62 | MISSENSE      | c.11C>A         | p.A4D              |             |        |      |         | Not scored                 | -                             |
| Chr15 | 68497606  | C         | T          | CALML4      | ENST00000448060_r62 | MISSENSE      | c.109G>A        | p.G37S             |             |        |      |         | TOLERATED                  | +                             |
| Chr15 | 86225404  | A         | C          | AKAP13      | ENST00000361243_r62 | MISSENSE      | c.5129A>C       | p.H1710P           |             |        |      |         | DAMAGING                   | +                             |
| Chr17 | 79428053  | C         | G          | BAHCC1      | ENST00000307745_r62 | MISSENSE      | c.6364C>G       | p.L2122V           |             |        |      |         | TOLERATED                  | -                             |
| Chr18 | 52899761  | G         | -          | TCF4        | ENST00000356073_r62 | FRAMESHIFT    | c.1628 C>-      | p.S543fs*1         |             |        |      |         | N/A                        | +                             |
| ChrX  | 12938569  | C         | A          | TLR8        | ENST00000218032_r62 | MISSENSE      | c.1410C>A       | p.F470L            |             |        |      |         | TOLERATED                  | -                             |
| ChrX  | 107823778 | C         | A          | COL4A5      | ENST00000328300_r62 | SILENT        | c.796C>A        | p.R266R            |             |        |      |         | N/A                        | -                             |

N/A, not applicable

\* Low confidence

\*\* These two silent mutations were intentionally introduced through genetic correction.

\*\*\* Expression in hepatocyte was analyzed using control samples in GSE11942. Genes with 'present' call in more than 50% of samples are considered as expressed.

Not detected

Detected

Supplementary Table 4. aCGH analyses of integration-free iPSCs and their derivatives.

| Cell line                                                 | A1AT genotype | Reference Genome | Abnormality | Chr. | Band          | Size  | Mean log2 ratio | No. of affected genes |
|-----------------------------------------------------------|---------------|------------------|-------------|------|---------------|-------|-----------------|-----------------------|
| <b>a. Primary factor-free A1ATD-hIPSCs</b>                |               |                  |             |      |               |       |                 |                       |
| SeV-iPSC1                                                 | Z/Z           | Fibroblast-B     | Gain        | 6    | q22.1         | 271kb | 0.52            | 2                     |
| SeV-iPSC2                                                 | Z/Z           | Fibroblast-B     | Loss        | 2    | q23.3         | 18kb  | -0.93           | 1                     |
| SeV-iPSC3                                                 | Z/Z           | Fibroblast-B     | -           |      |               |       |                 |                       |
| SeV-iPSC4                                                 | Z/Z           | Fibroblast-B     | Gain        | 10   | q21.1         | 1.1Mb | 0.52            | 2                     |
|                                                           |               |                  | Gain        | 16   | p13.12        | 76kb  | 0.61            | 0                     |
|                                                           |               |                  | Gain        | 22   | q13.33        | 86kb  | 0.63            | 3                     |
| SeV-iPSC5                                                 | Z/Z           | Fibroblast-B     | Gain        | 18   | p11.31-p11.23 | 951kb | 0.6             | 5                     |
| SeV-iPSC6                                                 | Z/Z           | Fibroblast-B     | Loss        | 22   | q13.1         | 10 kb | -0.81           | 1                     |
| <b>b. Homozygously targeted clones</b>                    |               |                  |             |      |               |       |                 |                       |
| iPSC1-C3*                                                 | PB/PB         | Fibroblast-B     | -           |      |               |       |                 |                       |
| iPSC3-G5                                                  | PB/PB         | Fibroblast-B     | -           |      |               |       |                 |                       |
| <b>c. Clones with bi-allelic <i>piggyBac</i> excision</b> |               |                  |             |      |               |       |                 |                       |
| iPSC1-C3-A8*                                              | Rev/Rev       | Fibroblast-B     | -           |      |               |       |                 |                       |
| iPSC1-C3-A9*                                              | Rev/Rev       | Fibroblast-B     | -           |      |               |       |                 |                       |
| iPSC3-G5-A7                                               | Rev/Rev       | Fibroblast-B     | -           |      |               |       |                 |                       |
| iPSC3-G5-C8                                               | Rev/Rev       | Fibroblast-B     | Loss        | 20   | p12.1         | 421kb | -1.00           | 1                     |

\* A deletion on Chr.6 found in the parental line is not shown.

Supplementary Table 5. Primer sequences

|                                                |             |                                                                                   |
|------------------------------------------------|-------------|-----------------------------------------------------------------------------------|
| Construction of pPB-R1R2-NP                    | attR1-F     | CTAGCTAGCACAAAGTTTGTACAAAAAGCTGAAC                                                |
|                                                | attR1-R     | CCCAAGCTTGAATTCGGATCCCATAGTGACTGGATATGTTGTGTT                                     |
|                                                | attR2-F     | CCGCTCGAGTCTAGACATAGTGACTGGATATGTTGTGTT                                           |
|                                                | attR2-R     | GACTAGTACCACCTTTGTACAAGAAAGCTGAA                                                  |
|                                                | EM7neo-F    | CCCAAGCTTGTGACAATTAATCATCGGCATAG                                                  |
|                                                | EM7neo-R    | CCGCTCGAGTCAGAAGAACTCGTCAAGAAGGCG                                                 |
| Construction of the Tyr-mini targeting vector  | Left arm-F  | GGCGCGCCATGGAACAGTGAAGTTCTCATCCCCAG                                               |
|                                                | Left arm-R  | TTTAAACGTACGTCACAATATGATTATCTTTCTAGGGTTAATGATATCAACATCTACGACCTCTTTGTATG           |
|                                                | Right arm-F | AAGAATGCATGCGTCAATTTTACGCAGACTATCTTTCTAGGGTTAAACATAGGTGTTGATCCATTGTTCAATTTGGCCATA |
|                                                | Right arm-R | CCTTAATTAAGCGGAAACTGTAAGTTTGGATTG                                                 |
| Construction of the Tyr-retrieving vector      | Left arm-F  | CCGCTCGAGTGCCCATGCCTAAACACAGATGTA                                                 |
|                                                | Left arm-R  | CCCAAGCTTTTTTGGATTCCGGATTCTGAGGCT                                                 |
|                                                | Right arm-F | CCCAAGCTTGTACAAGATTTTCATATGTAAGC                                                  |
|                                                | Right arm-R | AGGCGCGCCAGGAATTCATGCCCCAGTTGACA                                                  |
| Homologous recombination detection at Tyr      | F           | GTTGGCGCCTACCGGTGGATGTGGAATGTG                                                    |
|                                                | R           | GAAATCTCTTCAAGCTGGGAAAACCTAAAG                                                    |
| Tyr genotyping                                 | P1          | TCCTCGAGCCTGTGCCTCCTCTAAG                                                         |
|                                                | P2          | CCCAAGTACTCATCTGTGCAAATGTC                                                        |
|                                                | P3          | GCGACGGATTCCGCGCTATTAGAAAG                                                        |
| Tyr 5' probe                                   | F           | ACTCATATCCAGGATACTTGAGTG                                                          |
|                                                | R           | ATTACCACATGCCCAAACATAAAC                                                          |
| A1AT 2-kb fragment                             | F           | GTGGTGGGTCCCAGAAGAACAAGAGGAATGC                                                   |
|                                                | R           | CATAGCTGAGGAGTCCTTGCAATGGCCTTCC                                                   |
| Sequencing primers of the A1AT 2-kb region     | Seq1        | AGGGGCCGAGGGAACAATGAAGA                                                           |
|                                                | Seq2        | GCTAAAGATGACACTTATTTGGAA                                                          |
|                                                | Seq3        | ATGTGACAGGGAGGGAGAGGATGTG                                                         |
|                                                | Seq4        | GAAAAGTGGTGAATCCACCCAAA                                                           |
|                                                | Seq5        | GCCCATCTGTTTCTGGAGGGCTCCA                                                         |
|                                                | Seq6        | TCACCTAACAGACTCGGGCCCTGC                                                          |
|                                                | Seq7        | TACCAGGGTGCAACAAGTCTGTCAG                                                         |
| Construction of the A1AT-donor template vector | Left arm-F  | GGCGCGCCTCTGCACGACAGGTCTGCCAGCTTAC                                                |
|                                                | Left arm-R  | AAGAATGCATGCGTCAATTTTACGCAGACTATCTTTCTAGGGTTAACACAGCCTTATGCACGGCCTGGAGGGGAG       |
|                                                | Right arm-F | TTAACGTACGTCACAATATGATTATCTTTCTAGGGTTAACCATCGACGAGAAAGGGACTGAAGCTGCTGG            |
|                                                | Right arm-R | CCTTAATTAATGGTCTTCTGGGGCCTGCTGGGG                                                 |
| Genotyping after ZFN-mediated targeting        | U4          | TGGAGTGACGATGCTCTCCCTGTTC                                                         |
|                                                | L1          | GGTCAATGGGTGATGTGCTTCTCTC                                                         |
|                                                | PB5P2       | CGTCAATTTTACGCATGATTATCTTTAAC                                                     |
| Detection of backbone integration              | F           | ACACAGGAAACAGCTATGACCATGATTACG                                                    |
|                                                | R           | CGTCAATTTTACGCATGATTATCTTTAAC                                                     |
| Genotyping after transposon excision           | U4          | TGGAGTGACGATGCTCTCCCTGTTC                                                         |
|                                                | L2          | GCAGTTATTTTGGGTGGGATTAC                                                           |
|                                                | PB3-P2      | GCGACGGATTCCGCGCTATTAGAAAG                                                        |
| Detection of transposon re-integration         | F           | CTGCTGCAACTTACCTCCGGGATG                                                          |
|                                                | R           | CCAATCCTCCCTTGTCTGCTCTG                                                           |
| A1AT 5' probe                                  | F           | GATCCCCAACCTGAGGGTGACCAAG                                                         |
|                                                | R           | AAGTGACAGAGAAACGCAAGCCTTC                                                         |
| A1AT 3' probe                                  | F           | CGAGGGTACAGCTAAACTTCTGCAG                                                         |
|                                                | R           | CTCTGGGAGGTATGCTAGTTTGAA                                                          |
| Surveyor Nuclease assay                        | F           | AGGAGCAAGCCTATGTGA                                                                |
|                                                | R           | GAGGAGCGAGAGGCATTAT                                                               |

## Supplementary Analysis

### Analyses on 20q11.21 amplification

In the initial analysis of CGH data, we found amplification of 20q11.21 in one homozygous clone, C-B6 (Supplementary Fig. 4a). Through analysis of SNP array data, however, this amplification was found in all lines derived from A1ATD-hiPSC line C (Supplementary Fig. 4b). This region is found to be frequently amplified following prolonged hESC culture<sup>1,2</sup>. We individually analyzed CGH data of the 20q11.21 region in 3 primary A1ATD-hiPSC lines and 3 homozygous clones derived from line C. We first compared log<sub>2</sub> ratios in the affected region (position 29,297,270 - 30,638,579; 167 probes) and those in the adjacent normal copy number region (position 30,642,607 - 32,056,016) that contains the same number of probes (Supplementary Fig. 4a). Consistent with the SNP array data, all three homozygous clones showed significantly higher ratios in the affected region than in the adjacent region (Supplementary Fig. 4c). However, the ratios in C-C11 and C-G4 were lower than the cut-off used for the initial CGH data analysis. C-B6 showed a much higher ratio than C-C11 and C-G4, suggesting that C-B6 carried more copies of the 20q11.21 region than the others. Surprisingly, the primary hiPSC line C also showed a slightly higher ratio in the affected region than in the adjacent region whereas line A and B, both carrying normal chromosome 20 based on the SNP analysis, had same ratios. This result strongly suggests that line C is heterogeneous with a minor population of cells with amplified 20q11.21. The mean log<sub>2</sub> ratio of this region in line C is 0.208, which indicates 2.3 copies per diploid genome (Supplementary Fig. 4d). On the assumption that line C consists of 2 cell types (2-copy normal and 3-copy abnormal cells), 30 % of the population carries 3 copies of 20q11.21. Since we used genomic DNA from line C as a reference for subsequent CGH analyses of the line C-derived cell lines, the log<sub>2</sub> ratio of the 20q11.21 region in C-C11 and C-G4 was lower than a ratio representing single-copy gain (0.58) and thus this region was not called as a "Gain". We recalculated the copy number for 3 homozygous clones using the corrected copy number for the line C. Normalized copy numbers of 20q11.21 were 3 copies for C-C11 and C-G4, and 3.8 for C-B6 (Supplementary Fig. 4d), which is consistent with the SNP array data. Thus, in C-B6, the 20q11.21 region was further amplified. The ZFN-stimulated gene targeting in line C was conducted several passages after CGH analysis. The abnormal cells might become dominant at the time of gene targeting. As a result all derivative lines carried 20q11.21 amplification.

## References

- 1 Lefort, N. *et al.* Human embryonic stem cells reveal recurrent genomic instability at 20q11.21. *Nat Biotechnol* **26**, 1364-1366 (2008).
- 2 Spits, C. *et al.* Recurrent chromosomal abnormalities in human embryonic stem cells. *Nat Biotechnol* **26**, 1361-1363 (2008).

### **Analysis on one point mutation introduced during ZFN-stimulated targeting**

As ZFN-induced mutations are primarily InDels, the one observed single base substitution is unlikely to be the result of off-target ZFN cleavage. To support this conclusion we scanned the human genome (hg19) for potential ZFN cleavage sites and calculated the distance between maximum-likelihood off-target sites and the mutation. Both heterodimers and homodimers of either site with 5 or 6bp between individual ZFN sites and up to 6 mismatches from the intended binding sites were allowed; this returned 495 potential cleavage sites. The smallest distance between any of these 495 potential cleavage sites and any of the mutation was 110,407 bp. Thus, it is extremely unlikely that ZFN cleavage at any of these putative off-target sites caused the observed mutation.

**Supplementary Note.** Amino acid sequences of ZFNs against the Z mutation in *A1A7*.

Amino acid sequences of left (L) and right (R) ZFNs are shown. Zinc finger protein regions are underlined.

ZFN-L

MDYKDHDGDYKDHDIDYKDDDDKMAPKKKRKVGIHGVPAAMAERPFQCRICMRNFSQSGSLTRHIRHTG  
EKPFACDICGRKFAQSADRTKHTKIHTGSQKPFQCRICMRNFSRSDHLSTHIRHTGEKPFACDICGRKF  
AQSAHRITHTKIHLRGSQLVKSELEKKSELRHKLKYVPHEYIELIEIARNSTQDRILEMKVMEFFMKVY  
GYRGKHLGGSRKPDGAIYTVGSPIDYGVIVDTKAYSGGYNLPIGQADEMQRYVEENQTRNKHINPNEWWK  
VYPSSVTEFKFLFVSGHFKGNYKAQLTRLNHI TN CN GAVLSVEELLIGGEMIKAGTLTLEEVRKFNNGE  
INFRS

ZFN-R

MDYKDHDGDYKDHDIDYKDDDDKMAPKKKRKVGIHGVPAAMAERPFQCRICMRKFAQSSDLRRHTKIHTG  
EKPFQCRICMRNFSQSSDLRHIRHTHTGEKPFACDICGRKFAQSGNLRHTKIHTPNPHRRTPSHKPFQ  
CRICMRNFSQSGHLARHIRHTHTGEKPFACDICGRKFARLDNRTAHTKIHLRGSQLVKSELEKKSELRHK  
LKYVPHEYIELIEIARNSTQDRILEMKVMEFFMKVYGYRGKHLGGSRKPDGAIYTVGSPIDYGVIVDTKA  
YSGGYNLPIGQADEMQRYVEENQTRNKHINPNEWWKVYPSSVTEFKFLFVSGHFKGNYKAQLTRLNHITN  
CN GAVLSVEELLIGGEMIKAGTLTLEEVRKFNNGEINFRS
